# Supplementary material for: Enhancing energy predictions in multi-atom systems with multiscale topological learning
Source: Royal Society of Chemistry journal article supplement (doi:10.1039/d5ta02687c), 2025-01-01
Supplement: d5ta02687c1.pdf [file d5ta02687c1.pdf]

# Supplementary Information

## Enhancing Energy Predictions in Multi-Atom Systems with Multiscale Topological Learning

Dong Chen<sup>1,2</sup>, Rui Wang<sup>\*2</sup>, Guo-Wei Wei<sup>†2,3,4</sup> and Feng Pan<sup>‡1</sup>

<sup>1</sup>*School of Advanced Materials, Peking University, Shenzhen Graduate School, Shenzhen 518055, China*

<sup>2</sup>*Department of Mathematics, Michigan State University, MI, 48824, USA*

<sup>3</sup>*Department of Electrical and Computer Engineering, Michigan State University, MI 48824, USA*

<sup>4</sup>*Department of Biochemistry and Molecular Biology, Michigan State University, MI 48824, USA*

This document contains supplementary information which were not necessary to include in the central part of the paper but might be of interest to readers. This supplementary material includes the following sections:

### Contents

|                                         |          |
|-----------------------------------------|----------|
| <b>S1 Supplementary Note 1</b>          | <b>2</b> |
| <b>S2 Supplementary Note 2: Figures</b> | <b>3</b> |
| <b>S3 Supplementary Note 3: Tables</b>  | <b>5</b> |

---

\*Current address: Simons Center for Computational Physical Chemistry, New York University, New York, NY, 10003

†Corresponding author: [weig@msu.edu](mailto:weig@msu.edu)

‡Corresponding author: [panfeng@pkusz.edu.cn](mailto:panfeng@pkusz.edu.cn)

## S1 Supplementary Note 1

**Evaluation Metrics** In this study, the Pearson correlation coefficient (PCC) is used in the energy prediction, and it is defined as below:

$$PCC = \frac{\sum (x_i - \bar{x})(y_i - \bar{y})}{\sqrt{\sum (x_i - \bar{x})^2 \sum (y_i - \bar{y})^2}} \quad (1)$$

where  $x_i$  is the value of the  $x$  variable in  $i$ th sample,  $\bar{x}$  is the mean of the values of the  $x$  variable,  $y_i$  is the value of the  $y$  variable in the  $i$ th sample,  $\bar{y}$  is mean of the values of the  $y$  variable. The PCC explains the relationship between the  $x$  variable and  $y$  variable.

The root mean squared error (RMSE) is defined as below:

$$RMSE = \sqrt{\frac{1}{n} \sum_{i=1}^n (y_i - \hat{y}_i)^2} \quad (2)$$

where  $y_i$  and  $\hat{y}_i$  are predicted value and true value of  $i$ th sample respectively.

The mean absolute error (MAE) measures the mean difference between the prediction and the true value,

$$MAE = \frac{1}{n} \sum_{i=1}^n |y_i - \hat{y}_i| \quad (3)$$

where  $y_i$  and  $\hat{y}_i$  are predicted value and true value of  $i$ th sample respectively.

**GBDT parameters.** In the machine learning task, we use the gradient boosted decision trees (GBDT) algorithm to predict the multi-atom system’s energy. The ‘n\_estimators’ is setting to 15000, ‘max\_depth’ is setting to 7, ‘min\_samples\_split’ is setting to 5, 0.8 of the subsample is used, and the learning rate of the model is setting to 0.001. All other parameters were using the default values in the algorithm.[\[1\]](#)

## S2 Supplementary Note 2: Figures

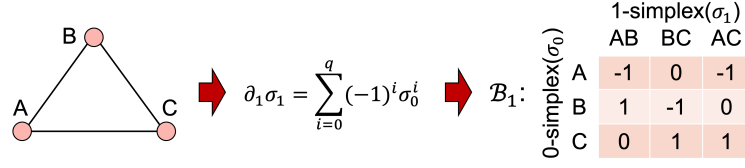

Supplementary Figure S1: Illustration of the matrix representation of the boundary operator.

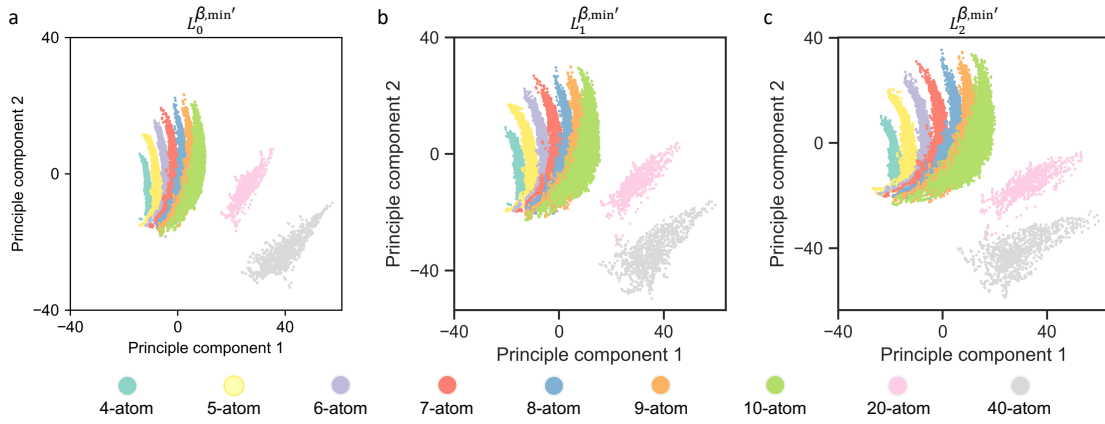

Supplementary Figure S2: Two-dimension PCA embedding of the representation on PLT features. The colored points correspond to structures with different atomic numbers. More points of the same color clustered together, indicating a better clustering result.

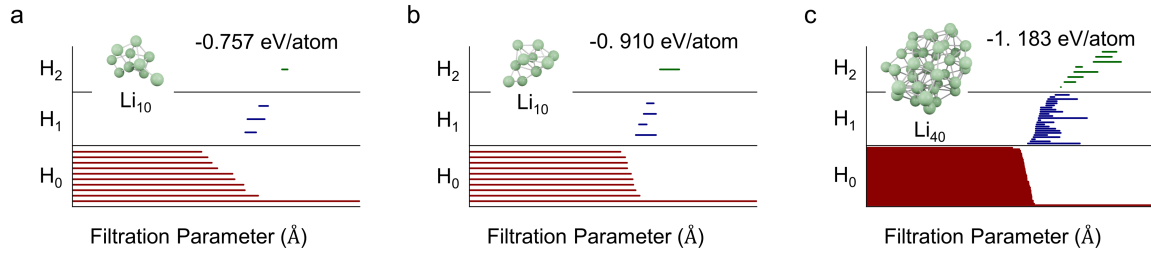

Supplementary Figure S3: Persistent homology analysis for three specific multi-atom systems. **a** and **b** show the topological fingerprints for two  $\text{Li}_{10}$  structures. The structure in **a** has the binding energies of -0.757 eV/atom. The binding energy of structure in **a** is -0.910 eV/atom. **c** shows the structure contains 40 atoms and has a richer topological information, and its binding energy is -1.183 eV/atom.

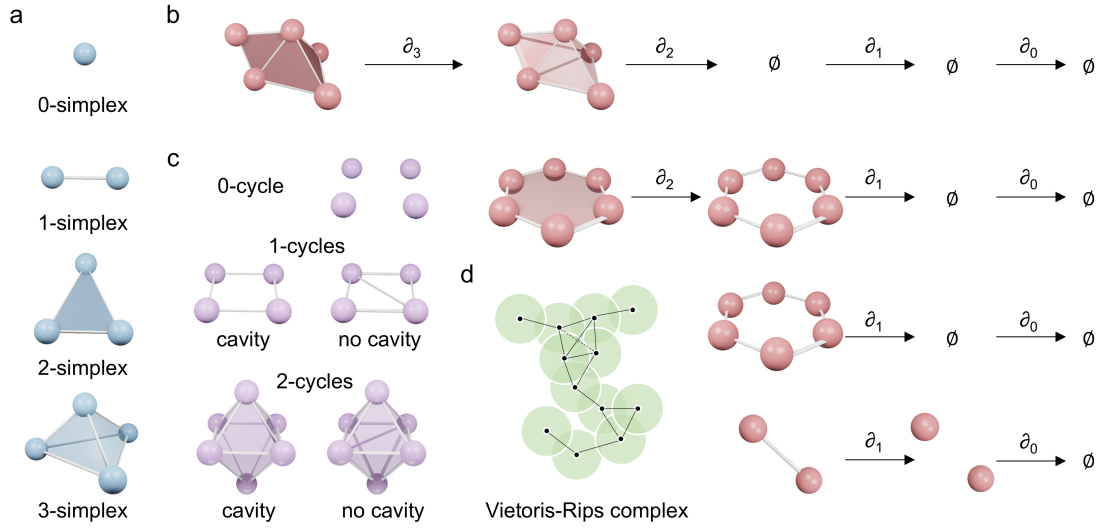

Supplementary Figure S4: Simplicial complex and boundary operator. **a** Illustration of 0-simplices, 1-simplex, and 2-simplex. **b** Boundary maps take  $k$ -chains to their boundaries. The example shown in the figure (red sphere) is for dimensions 1 through 3. The empty set is denoted by  $\emptyset$ , and  $\partial_k$  with  $k=0, 1, 2, 3$  represents the boundary operator of the corresponding dimension. **c** Illustration of  $k$ -cycles with  $k=0, 1$ , and  $2$  (purple spheres). For 1-cycles and 2-cycles, a trivial cycle (left) and a non-trivial (cavity-enclosing) cycle (right) are demonstrated. **d** Vietoris-Rips complex from a point cloud.

### S3 Supplementary Note 3: Tables

**Dataset** The original dataset is generated from DFT calculations and it is derived from our previous work.[2] All structures and energies are contained in one file. For the file containing all data, each row contains the number of atoms, the coordinates, and the binding energy in eV per atom. The first number of each row is the number of atoms contained in the structure, the last data is the corresponding binding energy, and the rest of the data are the 3D coordinates of the atoms in the structure.

Supplementary Table S1: Statistic information of all multi-atom systems. Energy unit is eV/atom.

| Datasets         | Structures | Maximum Energy | Minimum Energy | Mean Energy | Median Energy |
|------------------|------------|----------------|----------------|-------------|---------------|
| Li <sub>4</sub>  | 8326       | 1.7337         | -0.6567        | -0.5258     | -0.5734       |
| Li <sub>5</sub>  | 20988      | 2.1347         | -0.7087        | -0.5354     | -0.6172       |
| Li <sub>6</sub>  | 20977      | 2.0881         | -0.8346        | -0.6275     | -0.6962       |
| Li <sub>7</sub>  | 20998      | 2.0502         | -0.9051        | -0.6406     | -0.7259       |
| Li <sub>8</sub>  | 21000      | 2.1364         | -0.9462        | -0.6739     | -0.7552       |
| Li <sub>9</sub>  | 20999      | 1.4381         | -0.9495        | -0.6841     | -0.7793       |
| Li <sub>10</sub> | 20999      | 1.0743         | -0.9927        | -0.7089     | -0.8059       |
| Li <sub>20</sub> | 1000       | -0.3215        | -1.1052        | -0.9084     | -0.9488       |
| Li <sub>40</sub> | 1000       | -0.3905        | -1.1832        | -0.9541     | -0.9899       |

Supplementary Table S2: Prediction results for Li<sub>20</sub> and Li<sub>40</sub> clusters by using  $L_0$ ,  $L_{01}$ ,  $L_{012}$ ,  $L_1$ ,  $L_2$ , and  $L_{12}$

| Tasks | Feature type | MAE   | RMSE  | PCC   |
|-------|--------------|-------|-------|-------|
| Li20  | $L_0$        | 0.079 | 0.084 | 0.982 |
| Li20  | $L_{01}$     | 0.139 | 0.145 | 0.968 |
| Li20  | $L_{012}$    | 0.174 | 0.182 | 0.944 |
| Li20  | $L_1$        | 0.293 | 0.302 | 0.925 |
| Li20  | $L_2$        | 0.650 | 0.667 | 0.762 |
| Li20  | $L_{12}$     | 0.267 | 0.277 | 0.899 |
| Li40  | $L_0$        | 0.119 | 0.126 | 0.968 |
| Li40  | $L_{01}$     | 0.27  | 0.274 | 0.954 |
| Li40  | $L_{012}$    | 0.302 | 0.308 | 0.925 |
| Li40  | $L_1$        | 0.689 | 0.707 | 0.922 |
| Li40  | $L_2$        | 0.905 | 0.921 | 0.891 |
| Li40  | $L_{12}$     | 0.578 | 0.606 | 0.894 |

Supplementary Table S3: Prediction results for Li<sub>20</sub> and Li<sub>40</sub> clusters by using  $L_0$ ,  $\beta_{01}$ ,  $\beta_{012}$ ,  $\beta_1$ ,  $\beta_2$ , and  $\beta_{12}$

| Tasks | Feature type  | MAE   | RMSE  | PCC   |
|-------|---------------|-------|-------|-------|
| Li20  | $\beta_0$     | 0.139 | 0.158 | 0.508 |
| Li20  | $\beta_{01}$  | 0.118 | 0.134 | 0.742 |
| Li20  | $\beta_{012}$ | 0.113 | 0.126 | 0.771 |
| Li20  | $\beta_1$     | 0.122 | 0.145 | 0.603 |
| Li20  | $\beta_2$     | 0.185 | 0.212 | 0.451 |
| Li20  | $\beta_{12}$  | 0.117 | 0.138 | 0.611 |
| Li40  | $\beta_0$     | 0.203 | 0.221 | 0.592 |
| Li40  | $\beta_{01}$  | 0.18  | 0.192 | 0.801 |
| Li40  | $\beta_{012}$ | 0.168 | 0.179 | 0.817 |
| Li40  | $\beta_1$     | 0.134 | 0.158 | 0.35  |
| Li40  | $\beta_2$     | 0.195 | 0.219 | 0.555 |
| Li40  | $\beta_{12}$  | 0.125 | 0.152 | 0.385 |

Supplementary Table S4: Evaluation of five-fold cross-validation for  $\text{Li}_n$  clusters ( $n = 4, 5, 6, 7, 8, 9, 10, 20, 40$ ).

| $\text{Li}_n$ cluster | Feature       | MAE   | RMSW  | Pearson | $\text{Li}_n$ cluster | Feature       | MAE   | RMSW  | Pearson |
|-----------------------|---------------|-------|-------|---------|-----------------------|---------------|-------|-------|---------|
| 4                     | $\beta_0$     | 0.034 | 0.045 | 0.975   | 9                     | $\beta_0$     | 0.044 | 0.055 | 0.98    |
| 4                     | $\beta_{01}$  | 0.031 | 0.045 | 0.978   | 9                     | $\beta_{01}$  | 0.037 | 0.045 | 0.985   |
| 4                     | $\beta_{012}$ | 0.031 | 0.045 | 0.978   | 9                     | $\beta_{012}$ | 0.036 | 0.045 | 0.985   |
| 4                     | $\beta_1$     | 0.108 | 0.205 | 0.058   | 9                     | $\beta_1$     | 0.152 | 0.245 | 0.489   |
| 4                     | $\beta_2$     | 0.11  | 0.205 | 0       | 9                     | $\beta_2$     | 0.185 | 0.277 | 0.141   |
| 4                     | $\beta_{12}$  | 0.108 | 0.205 | 0.058   | 9                     | $\beta_{12}$  | 0.15  | 0.243 | 0.497   |
| 5                     | $\beta_0$     | 0.035 | 0.045 | 0.983   | 10                    | $\beta_0$     | 0.041 | 0.055 | 0.981   |
| 5                     | $\beta_{01}$  | 0.033 | 0.045 | 0.985   | 10                    | $\beta_{01}$  | 0.034 | 0.045 | 0.987   |
| 5                     | $\beta_{012}$ | 0.033 | 0.045 | 0.985   | 10                    | $\beta_{012}$ | 0.034 | 0.045 | 0.987   |
| 5                     | $\beta_1$     | 0.142 | 0.247 | 0.248   | 10                    | $\beta_1$     | 0.145 | 0.23  | 0.547   |
| 5                     | $\beta_2$     | 0.151 | 0.253 | 0       | 10                    | $\beta_2$     | 0.185 | 0.27  | 0.166   |
| 5                     | $\beta_{12}$  | 0.142 | 0.247 | 0.248   | 10                    | $\beta_{12}$  | 0.143 | 0.228 | 0.558   |
| 6                     | $\beta_0$     | 0.044 | 0.055 | 0.974   | 20                    | $\beta_0$     | 0.031 | 0.045 | 0.96    |
| 6                     | $\beta_{01}$  | 0.039 | 0.055 | 0.978   | 20                    | $\beta_{01}$  | 0.019 | 0.032 | 0.985   |
| 6                     | $\beta_{012}$ | 0.04  | 0.055 | 0.978   | 20                    | $\beta_{012}$ | 0.017 | 0.032 | 0.988   |
| 6                     | $\beta_1$     | 0.142 | 0.239 | 0.266   | 20                    | $\beta_1$     | 0.04  | 0.055 | 0.922   |
| 6                     | $\beta_2$     | 0.152 | 0.247 | 0.027   | 20                    | $\beta_2$     | 0.091 | 0.126 | 0.553   |
| 6                     | $\beta_{12}$  | 0.142 | 0.239 | 0.267   | 20                    | $\beta_{12}$  | 0.037 | 0.055 | 0.93    |
| 7                     | $\beta_0$     | 0.045 | 0.055 | 0.976   | 40                    | $\beta_0$     | 0.028 | 0.032 | 0.976   |
| 7                     | $\beta_{01}$  | 0.039 | 0.055 | 0.98    | 40                    | $\beta_{01}$  | 0.019 | 0.032 | 0.988   |
| 7                     | $\beta_{012}$ | 0.039 | 0.055 | 0.98    | 40                    | $\beta_{012}$ | 0.017 | 0.032 | 0.99    |
| 7                     | $\beta_1$     | 0.154 | 0.247 | 0.355   | 40                    | $\beta_1$     | 0.037 | 0.055 | 0.937   |
| 7                     | $\beta_2$     | 0.172 | 0.265 | 0.077   | 40                    | $\beta_2$     | 0.073 | 0.11  | 0.733   |
| 7                     | $\beta_{12}$  | 0.153 | 0.247 | 0.356   | 40                    | $\beta_{12}$  | 0.033 | 0.055 | 0.948   |
| 8                     | $\beta_0$     | 0.052 | 0.063 | 0.972   |                       |               |       |       |         |
| 8                     | $\beta_{01}$  | 0.045 | 0.055 | 0.977   |                       |               |       |       |         |
| 8                     | $\beta_{012}$ | 0.044 | 0.055 | 0.978   |                       |               |       |       |         |
| 8                     | $\beta_1$     | 0.158 | 0.251 | 0.42    |                       |               |       |       |         |
| 8                     | $\beta_2$     | 0.181 | 0.274 | 0.133   |                       |               |       |       |         |
| 8                     | $\beta_{12}$  | 0.156 | 0.251 | 0.427   |                       |               |       |       |         |

## References

- [1] Fabian Pedregosa, Gaël Varoquaux, Alexandre Gramfort, Vincent Michel, Bertrand Thirion, Olivier Grisel, Mathieu Blondel, Peter Prettenhofer, Ron Weiss, Vincent Dubourg, et al. Scikit-learn: Machine learning in python. *the Journal of machine Learning research*, 12:2825–2830, 2011.
- [2] Xin Chen, Dong Chen, Mouyi Weng, Yi Jiang, Guo-Wei Wei, and Feng Pan. Topology-based machine learning strategy for cluster structure prediction. *The journal of physical chemistry letters*, 11(11):4392–4401, 2020.
